# Supplementary material
Source: MDPI journal article supplement (https://www.mdpi.com/2312-7481/9/1/15)
Supplement: s1 [file s1]

## **Supplementary Materials**

### **The study of structural features of N- and O-derivatives of 4,5-dihydroxyimidazolidine-2-thione by NMR spectroscopy and quantum-chemical calculations**

Liudmila E. Kalichkina,. Alexander V. Fateev, Polina K. Krivolapenko,  
Kristina A. Isakova, Alexey S. Knyazev, Victor S. Malkov, Abdigali A. Bakibaev,  
Vera P. Tuguldurova

Table S1. The comparison of geometric parameters of **1t** optimized molecular structure and experimental data [17].

| Parameter                                                                          | Experimental data | Calculation data<br>M062X/6-311+G(d,p) |
|------------------------------------------------------------------------------------|-------------------|----------------------------------------|
| 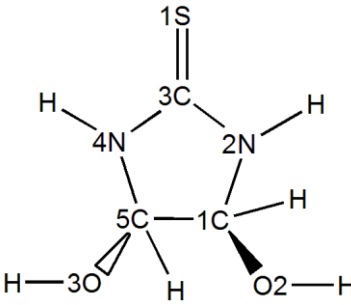 |                   |                                        |
| Bond, Å                                                                            |                   |                                        |
| 1S-3C                                                                              | 1.6909            | 1.674                                  |
| 2N-3C                                                                              | 1.3421            | 1.355                                  |
| 2N-1C                                                                              | 1.4523            | 1.449                                  |
| 4N-3C                                                                              | 1.3453            | 1.355                                  |
| 4N-5C                                                                              | 1.4559            | 1.450                                  |
| 2O-1C                                                                              | 1.4045            | 1.400                                  |
| 3O-5C                                                                              | 1.4087            | 1.400                                  |
| 5C-1C                                                                              | 1.5440            | 1.548                                  |
| Angle, °                                                                           |                   |                                        |
| 2N3C4N                                                                             | 109.0             | 107.23                                 |
| 2O1C5C3O                                                                           | 139.6             | 141.65                                 |

Table S2. The comparison of geometric parameters of **4t** optimized molecular structure and experimental data [18].

| Parameter                                                                            | Experimental data | Calculation data<br>M062X/6-311+G(d,p) |
|--------------------------------------------------------------------------------------|-------------------|----------------------------------------|
| 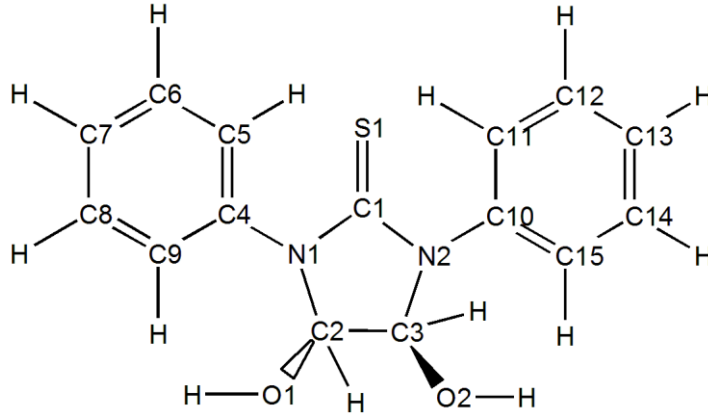 |                   |                                        |
| Bond, Å                                                                              |                   |                                        |
| S1—C1                                                                                | 1.669             | 1.672                                  |
| O1—C2                                                                                | 1.427             | 1.401                                  |
| O2—C3                                                                                | 1.416             | 1.397                                  |
| N1—C1                                                                                | 1.357             | 1.365                                  |

|             |        |        |
|-------------|--------|--------|
| N1—C4       | 1.444  | 1.428  |
| N1—C2       | 1.459  | 1.460  |
| N2—C1       | 1.373  | 1.360  |
| N2—C10      | 1.433  | 1.427  |
| N2—C3       | 1.454  | 1.457  |
| C2—C3       | 1.526  | 1.534  |
| C4—C9       | 1.374  | 1.391  |
| C4—C5       | 1.396  | 1.393  |
| C5—C6       | 1.394  | 1.390  |
| C6—C7       | 1.368  | 1.393  |
| C7—C8       | 1.387  | 1.392  |
| C8—C9       | 1.394  | 1.392  |
| C10—C15     | 1.390  | 1.392  |
| C10—C11     | 1.393  | 1.391  |
| C11—C12     | 1.389  | 1.392  |
| C12—C13     | 1.386  | 1.392  |
| C13—C14     | 1.384  | 1.393  |
| C14—C15     | 1.384  | 1.390  |
| Angle, °    |        |        |
| C1—N1—C4    | 126.4  | 125.31 |
| C1—N1—C2    | 110.97 | 111.24 |
| C4—N1—C2    | 122.5  | 120.15 |
| C1—N2—C10   | 126.6  | 125.85 |
| C1—N2—C3    | 111.1  | 112.11 |
| C10—N2—C3   | 119.53 | 121.26 |
| N1—C1—N2    | 108.0  | 107.57 |
| N1—C1—S1    | 125.46 | 126.09 |
| N2—C1—S1    | 126.6  | 126.33 |
| O1—C2—N1    | 111.04 | 112.31 |
| O1—C2—C3    | 110.76 | 108.15 |
| N1—C2—C3    | 102.8  | 101.91 |
| O2—C3—N2    | 112.5  | 112.44 |
| O2—C3—C2    | 113.8  | 114.15 |
| N2—C3—C2    | 101.37 | 101.64 |
| C9—C4—C5    | 119.9  | 120.82 |
| C9—C4—N1    | 119.9  | 119.00 |
| C5—C4—N1    | 120.1  | 120.13 |
| C6—C5—C4    | 119.6  | 119.42 |
| C7—C6—C5    | 120.9  | 120.10 |
| C6—C7—C8    | 119.0  | 120.14 |
| C7—C8—C9    | 121.1  | 120.06 |
| C4—C9—C8    | 119.5  | 119.47 |
| C15—C10—C11 | 120.3  | 120.83 |
| C15—C10—N2  | 120.0  | 120.30 |
| C11—C10—N2  | 119.6  | 118.85 |
| C12—C11—C10 | 119.4  | 119.51 |
| C13—C12—C11 | 119.9  | 120.03 |
| C14—C13—C12 | 120.7  | 120.09 |
| C15—C14—C13 | 119.6  | 120.16 |
| C14—C15—C10 | 120.1  | 119.39 |

Table S3. Cartesian coordinates of the optimized structures

| Structure | Atom | X       | Y       | Z       |
|-----------|------|---------|---------|---------|
| 1c        | C    | -1.3361 | -0.7632 | 0.2480  |
|           | C    | -1.2760 | 0.7885  | 0.2216  |
|           | C    | 0.8494  | -0.0681 | -0.1592 |
|           | H    | -1.4312 | -1.1363 | 1.2691  |
|           | H    | -1.7892 | 1.2440  | 1.0657  |
|           | N    | -0.0157 | -1.0924 | -0.2902 |
|           | H    | 0.3197  | -2.0422 | -0.3584 |
|           | N    | 0.1525  | 1.0113  | 0.2803  |
|           | H    | 0.5566  | 1.9344  | 0.2133  |
|           | S    | 2.4975  | -0.1101 | -0.4659 |
|           | O    | -2.3807 | -1.2893 | -0.4887 |
|           | H    | -2.4975 | -0.7288 | -1.2691 |
|           | O    | -1.8260 | 1.2156  | -1.0004 |
|           | H    | -2.3025 | 2.0422  | -0.8814 |
| 1t        | C    | -1.6024 | 0.6843  | 0.3620  |
|           | C    | -1.6024 | -0.6842 | -0.3618 |
|           | C    | 0.5928  | -0.0001 | 0.0001  |
|           | H    | -2.2666 | 0.6706  | 1.2238  |
|           | H    | -2.2666 | -0.6703 | -1.2237 |
|           | N    | -0.2106 | 0.7885  | 0.7532  |
|           | H    | 0.1622  | 1.5529  | 1.2964  |
|           | N    | -0.2107 | -0.7885 | -0.7532 |
|           | H    | 0.1622  | -1.5527 | -1.2964 |
|           | S    | 2.2666  | 0.0000  | 0.0000  |
|           | O    | -2.0242 | 1.7451  | -0.4489 |
|           | H    | -1.4509 | 1.8078  | -1.2227 |
|           | O    | -2.0242 | -1.7451 | 0.4488  |
|           | H    | -1.4509 | -1.8078 | 1.2227  |
| 2c        | C    | -1.3307 | -0.5712 | 0.2162  |
|           | C    | -1.0828 | 0.9406  | 0.0417  |
|           | C    | 0.9020  | -0.1985 | -0.2729 |
|           | H    | -1.4397 | -0.8366 | 1.2718  |
|           | H    | -1.5212 | 1.5402  | 0.8387  |
|           | N    | -0.0797 | -1.1241 | -0.3060 |
|           | N    | 0.3621  | 1.0050  | 0.0720  |
|           | S    | 2.5286  | -0.4830 | -0.5846 |
|           | O    | -2.4533 | -1.0347 | -0.4477 |
|           | H    | -2.5286 | -0.5326 | -1.2718 |
|           | O    | -1.5936 | 1.3219  | -1.2164 |
|           | H    | -1.9709 | 2.2052  | -1.1715 |
|           | C    | 0.1443  | -2.5561 | -0.3235 |
|           | H    | 0.8536  | -2.8022 | -1.1113 |
|           | H    | 0.5359  | -2.9077 | 0.6358  |
|           | H    | -0.8089 | -3.0395 | -0.5312 |

|    |   |         |         |         |
|----|---|---------|---------|---------|
|    | C | 1.0443  | 2.2741  | -0.1061 |
|    | H | 2.0466  | 2.2045  | 0.3109  |
|    | H | 1.1123  | 2.5473  | -1.1626 |
|    | H | 0.4841  | 3.0395  | 0.4309  |
| 2t | C | 1.5960  | -0.7695 | 0.0103  |
|    | C | 1.5960  | 0.7694  | -0.0103 |
|    | C | -0.5856 | -0.0000 | -0.0001 |
|    | H | 2.2630  | -1.1592 | 0.7788  |
|    | H | 2.2630  | 1.1591  | -0.7788 |
|    | N | 0.2086  | -1.0547 | 0.3216  |
|    | N | 0.2085  | 1.0545  | -0.3216 |
|    | S | -2.2630 | -0.0001 | 0.0000  |
|    | O | 2.0089  | -1.3496 | -1.1990 |
|    | H | 1.4551  | -1.0225 | -1.9187 |
|    | O | 2.0089  | 1.3494  | 1.1990  |
|    | H | 1.4550  | 1.0223  | 1.9187  |
|    | C | -0.2654 | -2.4150 | 0.4992  |
|    | H | -1.1240 | -2.4150 | 1.1680  |
|    | H | -0.5535 | -2.8648 | -0.4542 |
|    | H | 0.5406  | -2.9975 | 0.9441  |
|    | C | -0.2655 | 2.4148  | -0.4991 |
|    | H | -1.1241 | 2.4148  | -1.1679 |
|    | H | -0.5536 | 2.8645  | 0.4543  |
|    | H | 0.5405  | 2.9975  | -0.9439 |
| 3c | C | -1.0693 | 0.8733  | -0.0213 |
|    | C | 0.4546  | 1.0724  | -0.2105 |
|    | C | -0.1200 | -1.0927 | -0.8034 |
|    | H | -1.3302 | 0.8027  | 1.0379  |
|    | H | 0.9341  | 1.5018  | 0.6692  |
|    | N | -1.2832 | -0.4155 | -0.6779 |
|    | N | 0.9061  | -0.2748 | -0.4564 |
|    | S | 0.0385  | -2.6946 | -1.3034 |
|    | O | -1.8329 | 1.8948  | -0.5638 |
|    | H | -1.4081 | 2.1638  | -1.3907 |
|    | O | 0.6938  | 1.8731  | -1.3488 |
|    | H | 1.1220  | 2.6946  | -1.0895 |
|    | C | -2.6075 | -1.0214 | -0.7047 |
|    | H | -2.6197 | -1.7443 | -1.5197 |
|    | H | -3.3089 | -0.2228 | -0.9515 |
|    | C | 2.3234  | -0.5865 | -0.5884 |
|    | H | 2.4363  | -1.3100 | -1.3955 |
|    | H | 2.8244  | 0.3345  | -0.8933 |
|    | C | 2.9070  | -1.1263 | 0.7114  |
|    | H | 2.7895  | -0.4013 | 1.5197  |
|    | H | 2.4010  | -2.0505 | 0.9957  |
|    | H | 3.9713  | -1.3345 | 0.5878  |

|    |   |         |         |         |
|----|---|---------|---------|---------|
|    | C | -2.9753 | -1.6872 | 0.6175  |
|    | H | -3.9713 | -2.1277 | 0.5463  |
|    | H | -2.2614 | -2.4782 | 0.8537  |
|    | H | -2.9834 | -0.9645 | 1.4360  |
| 3t | C | -0.7070 | -1.6321 | -0.3095 |
|    | C | 0.7069  | -1.6321 | 0.3095  |
|    | C | 0.0000  | 0.5596  | -0.0000 |
|    | H | -1.3879 | -2.2441 | 0.2836  |
|    | H | 1.3879  | -2.2441 | -0.2836 |
|    | N | -1.0688 | -0.2306 | -0.2615 |
|    | N | 1.0688  | -0.2306 | 0.2615  |
|    | S | 0.0000  | 2.2441  | -0.0000 |
|    | O | -0.7579 | -2.1490 | -1.6127 |
|    | H | -0.2115 | -1.6037 | -2.1924 |
|    | O | 0.7579  | -2.1490 | 1.6127  |
|    | H | 0.2115  | -1.6037 | 2.1924  |
|    | C | -2.4325 | 0.2230  | -0.4985 |
|    | H | -2.3803 | 1.1792  | -1.0193 |
|    | H | -2.8913 | -0.5023 | -1.1733 |
|    | C | 2.4325  | 0.2230  | 0.4984  |
|    | H | 2.3803  | 1.1792  | 1.0193  |
|    | H | 2.8913  | -0.5023 | 1.1733  |
|    | C | 3.2244  | 0.3512  | -0.7967 |
|    | H | 4.2439  | 0.6769  | -0.5827 |
|    | H | 3.2733  | -0.6064 | -1.3196 |
|    | H | 2.7550  | 1.0853  | -1.4542 |
|    | C | -3.2244 | 0.3512  | 0.7967  |
|    | H | -4.2439 | 0.6769  | 0.5826  |
|    | H | -3.2733 | -0.6064 | 1.3196  |
|    | H | -2.7550 | 1.0853  | 1.4542  |
| 4c | C | -0.7871 | 1.1546  | 0.7546  |
|    | C | 0.7413  | 1.2162  | 0.5613  |
|    | C | -0.0129 | -0.9149 | -0.0131 |
|    | H | -1.0540 | 1.0826  | 1.8119  |
|    | H | 1.2641  | 1.6343  | 1.4206  |
|    | N | -1.1077 | -0.1210 | 0.0885  |
|    | N | 1.0742  | -0.1898 | 0.3861  |
|    | S | 0.0100  | -2.5116 | -0.5161 |
|    | O | -1.4621 | 2.2358  | 0.2247  |
|    | H | -0.9949 | 2.5116  | -0.5769 |
|    | O | 0.9902  | 1.9617  | -0.6023 |
|    | H | 1.8737  | 2.3422  | -0.5760 |
|    | C | -2.4573 | -0.5835 | 0.0376  |
|    | C | -2.9564 | -1.3951 | 1.0533  |
|    | C | -3.2712 | -0.1768 | -1.0131 |
|    | C | -4.2816 | -1.8116 | 1.0063  |

|    |   |         |         |         |
|----|---|---------|---------|---------|
|    | H | -2.3043 | -1.7000 | 1.8640  |
|    | C | -4.5991 | -0.5927 | -1.0522 |
|    | H | -2.8582 | 0.4572  | -1.7883 |
|    | C | -5.1030 | -1.4107 | -0.0457 |
|    | H | -4.6735 | -2.4483 | 1.7903  |
|    | H | -5.2367 | -0.2794 | -1.8700 |
|    | H | -6.1357 | -1.7369 | -0.0792 |
|    | C | 2.4329  | -0.5827 | 0.1807  |
|    | C | 3.2200  | -0.8793 | 1.2878  |
|    | C | 2.9669  | -0.6187 | -1.1050 |
|    | C | 4.5565  | -1.2229 | 1.1066  |
|    | H | 2.7801  | -0.8425 | 2.2777  |
|    | C | 4.3014  | -0.9667 | -1.2799 |
|    | H | 2.3331  | -0.3823 | -1.9518 |
|    | C | 5.0959  | -1.2681 | -0.1755 |
|    | H | 5.1725  | -1.4590 | 1.9658  |
|    | H | 4.7217  | -1.0007 | -2.2777 |
|    | H | 6.1357  | -1.5381 | -0.3161 |
| 4t | C | -0.7624 | 1.6030  | 0.0992  |
|    | C | 0.7511  | 1.6213  | -0.1468 |
|    | C | 0.0023  | -0.5934 | -0.0677 |
|    | H | -1.2949 | 2.2659  | -0.5856 |
|    | H | 1.2549  | 2.2392  | 0.5949  |
|    | N | -1.0960 | 0.2096  | -0.1787 |
|    | N | 1.0937  | 0.2135  | 0.0220  |
|    | S | 0.0030  | -2.2659 | -0.0578 |
|    | O | -0.9911 | 1.9480  | 1.4373  |
|    | H | -1.9393 | 2.0344  | 1.5890  |
|    | O | 1.1204  | 2.1134  | -1.4013 |
|    | H | 0.7008  | 1.5860  | -2.0926 |
|    | C | -2.4516 | -0.2316 | -0.1047 |
|    | C | -2.9498 | -0.7640 | 1.0821  |
|    | C | -3.2757 | -0.0667 | -1.2128 |
|    | C | -4.2853 | -1.1436 | 1.1528  |
|    | H | -2.2870 | -0.8834 | 1.9313  |
|    | C | -4.6132 | -0.4425 | -1.1333 |
|    | H | -2.8641 | 0.3495  | -2.1252 |
|    | C | -5.1168 | -0.9823 | 0.0468  |
|    | H | -4.6775 | -1.5608 | 2.0724  |
|    | H | -5.2592 | -0.3175 | -1.9938 |
|    | H | -6.1577 | -1.2770 | 0.1055  |
|    | C | 2.4530  | -0.2194 | 0.0512  |
|    | C | 3.2029  | 0.0014  | 1.2012  |
|    | C | 3.0240  | -0.8159 | -1.0690 |
|    | C | 4.5408  | -0.3810 | 1.2310  |
|    | H | 2.7361  | 0.4650  | 2.0629  |

|       |   |         |         |         |
|-------|---|---------|---------|---------|
|       | C | 4.3584  | -1.2040 | -1.0298 |
|       | H | 2.4199  | -0.9778 | -1.9541 |
|       | C | 5.1172  | -0.9860 | 0.1181  |
|       | H | 5.1278  | -0.2104 | 2.1252  |
|       | H | 4.8073  | -1.6719 | -1.8976 |
|       | H | 6.1577  | -1.2871 | 0.1436  |
| 6c    | C | -0.5764 | -1.1467 | -0.5574 |
|       | C | 0.9659  | -1.1981 | -0.4088 |
|       | C | 0.2579  | 1.0102  | -0.1873 |
|       | H | -0.8860 | -1.3531 | -1.5835 |
|       | H | 1.4466  | -1.7470 | -1.2179 |
|       | N | -0.8594 | 0.2492  | -0.2238 |
|       | N | 1.3338  | 0.1978  | -0.4268 |
|       | S | 0.3213  | 2.6633  | 0.0581  |
|       | O | -1.2468 | -2.0464 | 0.2537  |
|       | H | -0.8473 | -2.0120 | 1.1339  |
|       | O | 1.3371  | -1.7412 | 0.8443  |
|       | H | 1.5957  | -2.6633 | 0.7370  |
|       | C | 2.7038  | 0.5724  | -0.1428 |
|       | H | 2.8777  | 1.5744  | -0.5267 |
|       | H | 3.3390  | -0.1443 | -0.6699 |
|       | O | 2.9907  | 0.5966  | 1.2339  |
|       | H | 2.7868  | -0.2797 | 1.5835  |
|       | C | -2.2001 | 0.7334  | -0.0666 |
|       | H | -2.2598 | 1.7410  | -0.4810 |
|       | H | -2.8592 | 0.0576  | -0.6178 |
|       | O | -2.5181 | 0.7328  | 1.3126  |
|       | H | -3.3390 | 1.2205  | 1.4349  |
| 6t/6a | C | 0.6684  | -1.3436 | -0.0443 |
|       | C | -0.8355 | -1.2803 | 0.2481  |
|       | C | 0.0106  | 0.8734  | 0.0631  |
|       | H | 0.9078  | -2.0380 | -0.8530 |
|       | H | -1.0898 | -1.9014 | 1.1093  |
|       | N | 0.9467  | 0.0215  | -0.4472 |
|       | N | -1.0160 | 0.1233  | 0.5473  |
|       | S | 0.1298  | 2.5395  | 0.1091  |
|       | O | 1.3232  | -1.6897 | 1.1523  |
|       | H | 2.2240  | -1.3401 | 1.1219  |
|       | O | -1.6436 | -1.5884 | -0.8658 |
|       | H | -1.7950 | -2.5395 | -0.9018 |
|       | C | 2.2814  | 0.4218  | -0.8232 |
|       | H | 2.2199  | 1.3873  | -1.3231 |
|       | H | 2.6782  | -0.3308 | -1.5025 |
|       | C | -2.3343 | 0.6356  | 0.8523  |
|       | H | -2.8148 | -0.0997 | 1.5025  |
|       | H | -2.2279 | 1.5835  | 1.3746  |



|    |   |         |         |         |
|----|---|---------|---------|---------|
|    | O | -3.0982 | 0.8787  | -0.3030 |
|    | H | -3.1533 | 0.0477  | -0.7909 |
|    | O | 3.1533  | 0.4628  | 0.2888  |
|    | H | 2.9443  | 1.2497  | 0.8071  |
| 6b | C | 0.5605  | 1.3970  | -0.1504 |
|    | C | -0.9568 | 1.1411  | -0.1607 |
|    | C | 0.1486  | -0.8700 | -0.4709 |
|    | H | 0.8694  | 1.9368  | 0.7469  |
|    | H | -1.4557 | 1.8245  | -0.8507 |
|    | N | 1.0900  | 0.0428  | -0.1442 |
|    | N | -1.0446 | -0.2276 | -0.6161 |
|    | S | 0.4238  | -2.5133 | -0.6626 |
|    | O | 0.8944  | 2.0982  | -1.3181 |
|    | H | 1.7572  | 2.5133  | -1.2181 |
|    | O | -1.5386 | 1.2008  | 1.1239  |
|    | H | -1.8020 | 2.1074  | 1.3181  |
|    | C | 2.4886  | -0.2937 | 0.0520  |
|    | H | 3.0454  | 0.6396  | 0.1189  |
|    | H | 2.8315  | -0.8664 | -0.8122 |
|    | C | -2.3300 | -0.8935 | -0.6491 |
|    | H | -3.0454 | -0.1717 | -1.0507 |
|    | H | -2.2601 | -1.7543 | -1.3096 |
|    | O | -2.7301 | -1.3676 | 0.6125  |
|    | H | -2.7479 | -0.6091 | 1.2093  |
|    | O | 2.7072  | -0.9995 | 1.2426  |
|    | H | 2.3295  | -1.8806 | 1.1211  |
| 6d | C | -0.7653 | 1.2935  | 0.0387  |
|    | C | 0.7651  | 1.2936  | -0.0387 |
|    | C | -0.0000 | -0.8992 | 0.0000  |
|    | H | -1.1839 | 1.5960  | -0.9274 |
|    | H | 1.1837  | 1.5962  | 0.9275  |
|    | N | -1.0608 | -0.1135 | 0.2998  |
|    | N | 1.0608  | -0.1134 | -0.2997 |
|    | S | 0.0002  | -2.5821 | 0.0000  |
|    | O | -1.2041 | 2.1288  | 1.0637  |
|    | H | -2.0094 | 2.5817  | 0.7972  |
|    | O | 1.2038  | 2.1289  | -1.0637 |
|    | H | 2.0090  | 2.5821  | -0.7971 |
|    | C | -2.4143 | -0.6204 | 0.3739  |
|    | H | -3.0426 | 0.1792  | 0.7625  |
|    | H | -2.4182 | -1.4612 | 1.0683  |
|    | C | 2.4144  | -0.6201 | -0.3739 |
|    | H | 2.4184  | -1.4609 | -1.0684 |
|    | H | 3.0426  | 0.1796  | -0.7623 |
|    | O | 2.9263  | -0.9894 | 0.8812  |
|    | H | 2.4828  | -1.8051 | 1.1456  |

|     |   |         |         |         |
|-----|---|---------|---------|---------|
|     | O | -2.9263 | -0.9896 | -0.8812 |
|     | H | -2.4826 | -1.8053 | -1.1456 |
| 9c  | C | 0.6730  | -0.8902 | 0.3447  |
|     | C | 0.3895  | 0.6240  | 0.4620  |
|     | C | -1.5745 | -0.5036 | -0.0922 |
|     | H | 0.7428  | -1.3353 | 1.3464  |
|     | H | 0.7763  | 1.0493  | 1.3915  |
|     | N | -0.5518 | -1.3622 | -0.3110 |
|     | H | -0.7637 | -2.3442 | -0.4153 |
|     | N | -1.0656 | 0.6168  | 0.4677  |
|     | H | -1.6353 | 1.4416  | 0.5818  |
|     | S | -3.1918 | -0.7877 | -0.4305 |
|     | O | 1.8266  | -1.1310 | -0.3732 |
|     | O | 0.9248  | 1.2866  | -0.6401 |
|     | C | 0.8233  | 2.7002  | -0.5484 |
|     | H | 1.2656  | 3.0593  | 0.3865  |
|     | H | 1.3742  | 3.1112  | -1.3915 |
|     | H | -0.2179 | 3.0305  | -0.6096 |
|     | C | 2.2144  | -2.4987 | -0.3640 |
|     | H | 1.5084  | -3.1112 | -0.9323 |
|     | H | 3.1918  | -2.5523 | -0.8378 |
|     | H | 2.2831  | -2.8743 | 0.6618  |
| 9t  | C | -1.3806 | 0.6853  | 0.3462  |
|     | C | -1.3803 | -0.6847 | -0.3463 |
|     | C | 0.8173  | 0.0008  | -0.0001 |
|     | H | -2.0186 | 0.6880  | 1.2337  |
|     | H | -2.0184 | -0.6877 | -1.2338 |
|     | N | 0.0181  | 0.8236  | 0.7121  |
|     | N | 0.0184  | -0.8223 | -0.7124 |
|     | S | 2.4956  | 0.0011  | -0.0001 |
|     | O | -1.8007 | 1.6395  | -0.5839 |
|     | O | -1.7998 | -1.6391 | 0.5838  |
|     | C | -1.8645 | -2.9551 | 0.0528  |
|     | H | -2.4949 | -2.9786 | -0.8419 |
|     | H | -2.3034 | -3.5852 | 0.8230  |
|     | C | -1.8657 | 2.9555  | -0.0530 |
|     | H | -2.4956 | 2.9788  | 0.8420  |
|     | H | -2.3054 | 3.5852  | -0.8231 |
|     | H | 0.3940  | 1.5243  | 1.3311  |
|     | H | 0.3946  | -1.5231 | -1.3311 |
|     | H | -0.8684 | 3.3324  | 0.1902  |
|     | H | -0.8672 | -3.3316 | -0.1912 |
| 10t | C | -0.7328 | -0.9763 | 0.2403  |
|     | C | 0.7327  | -0.9762 | -0.2403 |
|     | C | -0.0002 | 1.2181  | -0.0000 |
|     | H | -0.8526 | -1.6280 | 1.1090  |

|     |   |         |         |         |
|-----|---|---------|---------|---------|
|     | H | 0.8526  | -1.6279 | -1.1090 |
|     | N | -0.9109 | 0.4217  | 0.6000  |
|     | N | 0.9106  | 0.4219  | -0.6000 |
|     | S | -0.0003 | 2.8974  | -0.0000 |
|     | O | -1.5575 | -1.3752 | -0.8142 |
|     | O | 1.5574  | -1.3750 | 0.8141  |
|     | C | 2.7802  | -2.0044 | 0.4217  |
|     | H | 2.5456  | -2.8972 | -0.1684 |
|     | H | 3.2383  | -2.3255 | 1.3566  |
|     | C | -2.7802 | -2.0046 | -0.4217 |
|     | H | -2.5455 | -2.8974 | 0.1685  |
|     | H | -3.2383 | -2.3257 | -1.3566 |
|     | C | 3.7145  | -1.0840 | -0.3444 |
|     | H | 3.8918  | -0.1613 | 0.2124  |
|     | H | 3.3195  | -0.8378 | -1.3335 |
|     | C | -3.7145 | -1.0842 | 0.3444  |
|     | H | -3.8919 | -0.1617 | -0.2124 |
|     | H | -3.3194 | -0.8379 | 1.3335  |
|     | H | -1.7638 | 0.8055  | 0.9776  |
|     | H | 1.7634  | 0.8058  | -0.9776 |
|     | H | -4.6727 | -1.5845 | 0.4959  |
|     | H | 4.6727  | -1.5841 | -0.4957 |
| 11t | C | -0.7447 | -0.9785 | 0.2001  |
|     | C | 0.7446  | -0.9784 | -0.2002 |
|     | C | -0.0002 | 1.2151  | -0.0001 |
|     | H | -0.9146 | -1.6342 | 1.0572  |
|     | H | 0.9146  | -1.6341 | -1.0575 |
|     | N | -0.9385 | 0.4183  | 0.5557  |
|     | N | 0.9381  | 0.4185  | -0.5557 |
|     | S | -0.0003 | 2.8945  | -0.0001 |
|     | O | -1.5112 | -1.3694 | -0.9006 |
|     | O | 1.5111  | -1.3692 | 0.9005  |
|     | C | 2.7541  | -1.9965 | 0.5817  |
|     | H | 2.5590  | -2.8944 | -0.0184 |
|     | H | 3.1630  | -2.3135 | 1.5423  |
|     | C | -2.7542 | -1.9966 | -0.5817 |
|     | H | -2.5590 | -2.8945 | 0.0182  |
|     | H | -3.1631 | -2.3137 | -1.5423 |
|     | C | 3.7410  | -1.0867 | -0.1352 |
|     | H | 3.8345  | -0.1506 | 0.4238  |
|     | H | 3.3646  | -0.8430 | -1.1347 |
|     | C | -3.7410 | -1.0868 | 0.1350  |
|     | H | -3.8347 | -0.1508 | -0.4240 |
|     | H | -3.3646 | -0.8430 | 1.1345  |
|     | H | -1.8068 | 0.8015  | 0.8971  |
|     | H | 1.8064  | 0.8017  | -0.8972 |

|     |   |         |         |         |
|-----|---|---------|---------|---------|
|     | C | -5.1025 | -1.7660 | 0.2673  |
|     | H | -5.8040 | -1.1324 | 0.8111  |
|     | H | -5.5287 | -1.9762 | -0.7165 |
|     | H | -5.0159 | -2.7124 | 0.8069  |
|     | C | 5.1025  | -1.7658 | -0.2673 |
|     | H | 5.8040  | -1.1323 | -0.8110 |
|     | H | 5.5286  | -1.9759 | 0.7167  |
|     | H | 5.0160  | -2.7123 | -0.8067 |
| 12t | C | 0.7568  | -0.9882 | -0.1495 |
|     | C | -0.7568 | -0.9882 | 0.1494  |
|     | C | 0.0000  | 1.2070  | -0.0001 |
|     | H | 0.9828  | -1.6362 | -0.9997 |
|     | H | -0.9828 | -1.6362 | 0.9996  |
|     | N | 0.9786  | 0.4107  | -0.4803 |
|     | N | -0.9786 | 0.4107  | 0.4802  |
|     | S | -0.0001 | 2.8868  | -0.0001 |
|     | O | 1.4458  | -1.3935 | 0.9960  |
|     | O | -1.4457 | -1.3936 | -0.9961 |
|     | C | -2.7119 | -2.0096 | -0.7542 |
|     | H | -2.5664 | -2.8868 | -0.1113 |
|     | H | -3.0459 | -2.3578 | -1.7325 |
|     | C | 2.7120  | -2.0095 | 0.7541  |
|     | H | 2.5664  | -2.8867 | 0.1112  |
|     | H | 3.0460  | -2.3577 | 1.7325  |
|     | C | -3.7474 | -1.0742 | -0.1482 |
|     | H | -3.7890 | -0.1532 | -0.7401 |
|     | H | -3.4557 | -0.8013 | 0.8734  |
|     | C | -5.1280 | -1.7273 | -0.1028 |
|     | H | -5.4350 | -1.9861 | -1.1213 |
|     | H | -5.0652 | -2.6680 | 0.4542  |
|     | C | -6.1748 | -0.8195 | 0.5375  |
|     | H | -6.2663 | 0.1180  | -0.0169 |
|     | H | -7.1559 | -1.2973 | 0.5568  |
|     | H | -5.8990 | -0.5743 | 1.5664  |
|     | C | 3.7474  | -1.0741 | 0.1480  |
|     | H | 3.7891  | -0.1531 | 0.7399  |
|     | H | 3.4557  | -0.8013 | -0.8736 |
|     | C | 5.1280  | -1.7273 | 0.1026  |
|     | H | 5.4351  | -1.9861 | 1.1210  |
|     | H | 5.0652  | -2.6680 | -0.4545 |
|     | C | 6.1748  | -0.8195 | -0.5379 |
|     | H | 6.2664  | 0.1180  | 0.0165  |
|     | H | 7.1559  | -1.2973 | -0.5573 |
|     | H | 5.8989  | -0.5742 | -1.5667 |
|     | H | 1.8669  | 0.7944  | -0.7643 |
|     | H | -1.8669 | 0.7943  | 0.7642  |
